# Supplementary material
Source: ML conference proceedings conference paper supplement (https://openaccess.thecvf.com/content/CVPR2021/html/Ost_Neural_Scene_Graphs_CVPR_2021_paper.html)
Supplement: Supplementary file 1 [file Ost_Neural_Scene_Graphs_CVPR_2021_supplemental.zip]

Archive with 2 entries (2 files):
- Neural Scene Graphs_supplementary material.pdf
- Neural Scene Graphs_supplementary video_CVPR 2021.mp4
